# Supplementary material for: Cd(ii) coordination polymers constructed from tris-pyridyl-tris-amide and polycarboxylic acid: synthesis, structures and sensing properties
Source: Royal Society of Chemistry journal article supplement (doi:10.1039/d3ce01096a), 2023-12-18

## Supplementary Materials

### **Cd(II) Coordination Polymers Constructed from Tris-pyridyl-tris-amide and Polycarboxylic acid: Synthesis, Structures and Sensing Properties**

Chia-Ling Chen, Song-Wei Wang, Shih-Ying Zhong and Jhy-Der Chen\*

**Fig. S1.** IR spectrum of complex 1.

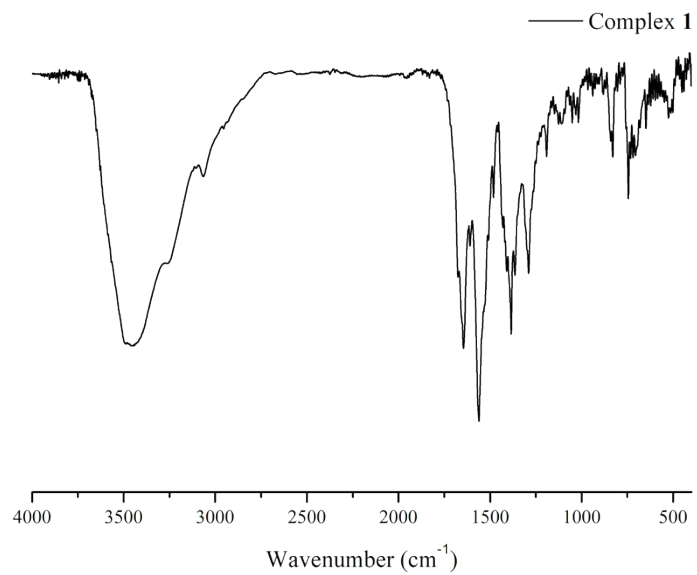

**Fig. S2.** IR spectrum of complex **2**.

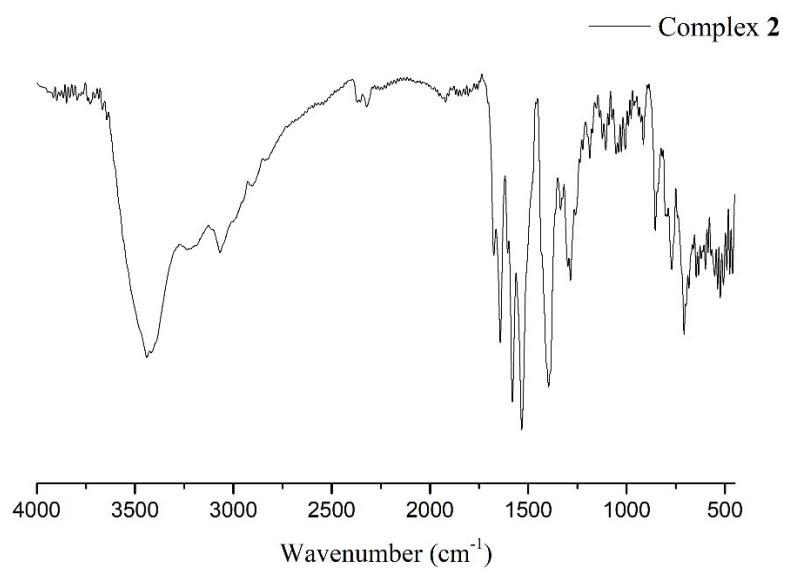

**Fig. S3.** IR spectrum of complex **3**.

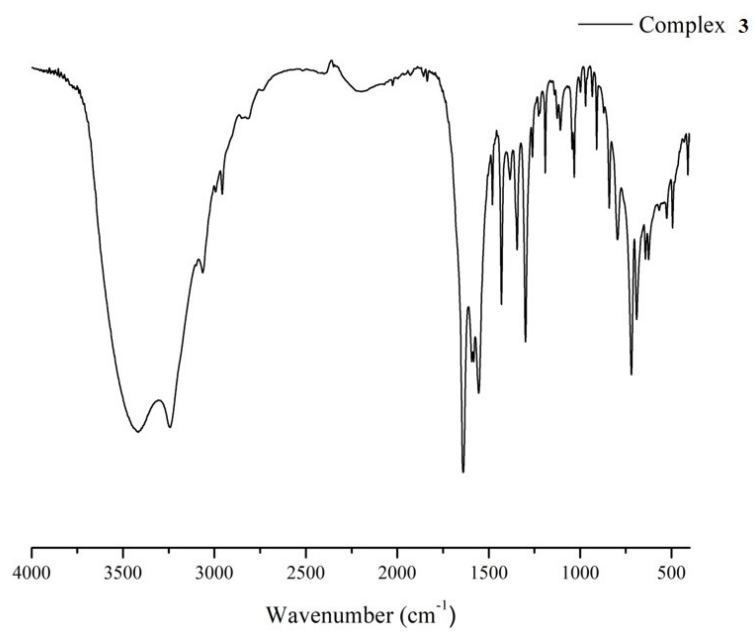

**Fig. S4.** The PXRD patterns of complex **1**.

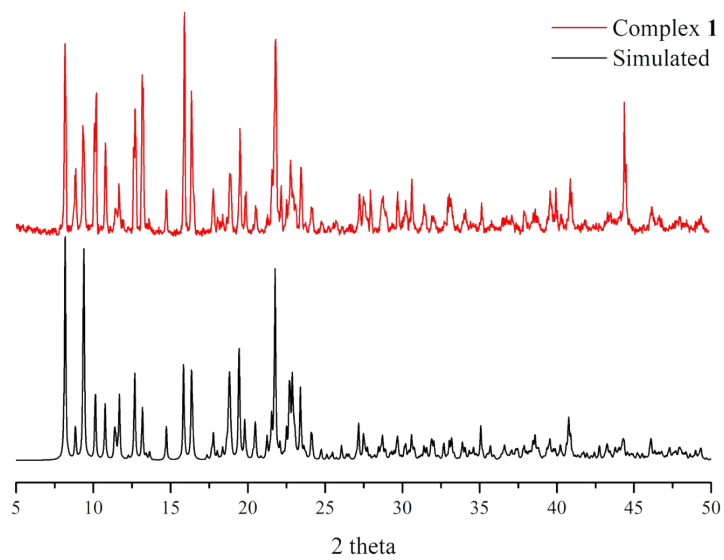

**Fig. S5.** The PXRD patterns of complex **2**.

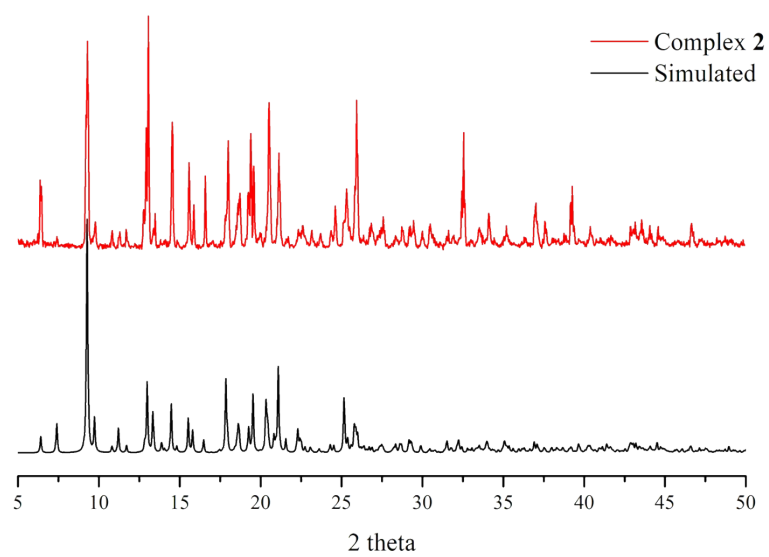

**Fig. S6.** The PXRD patterns of complex **3**.

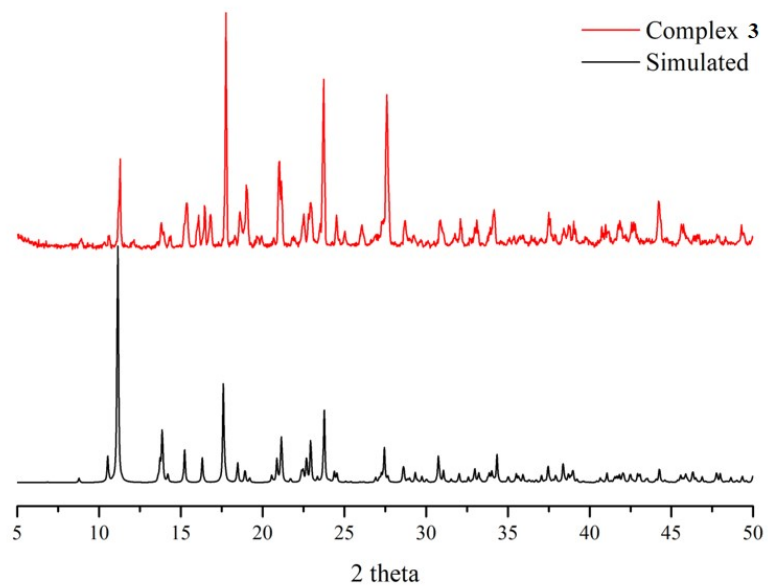

**Fig. S7.** TGA curve of complex **1**.

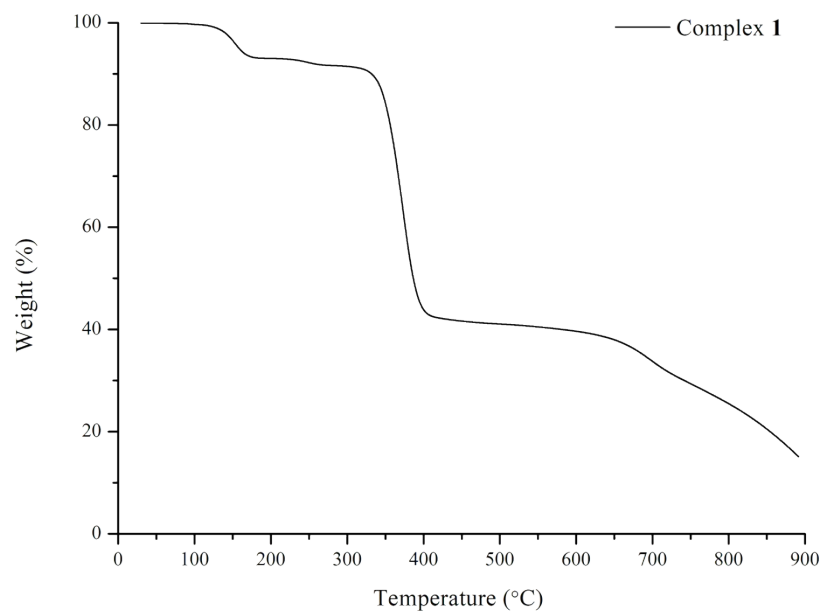



**Fig. S8.** TGA curve of complex **2**.

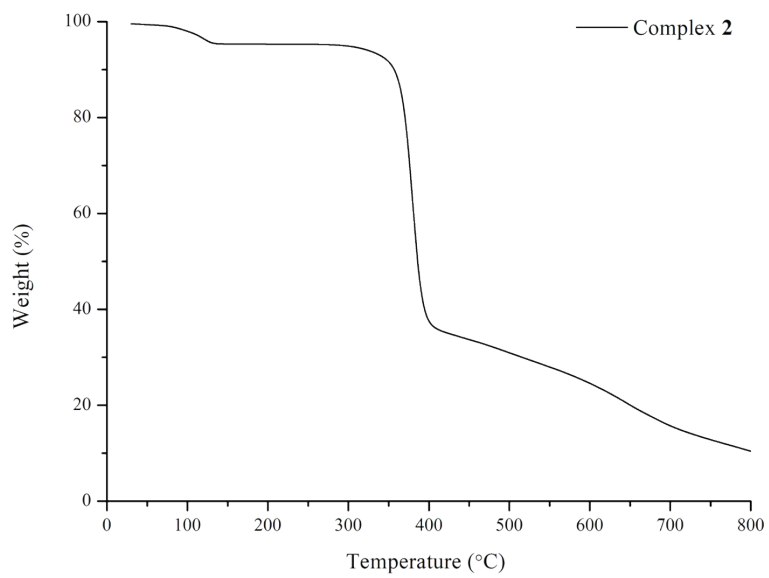

**Fig. S9.** TGA curve of complex **3**.

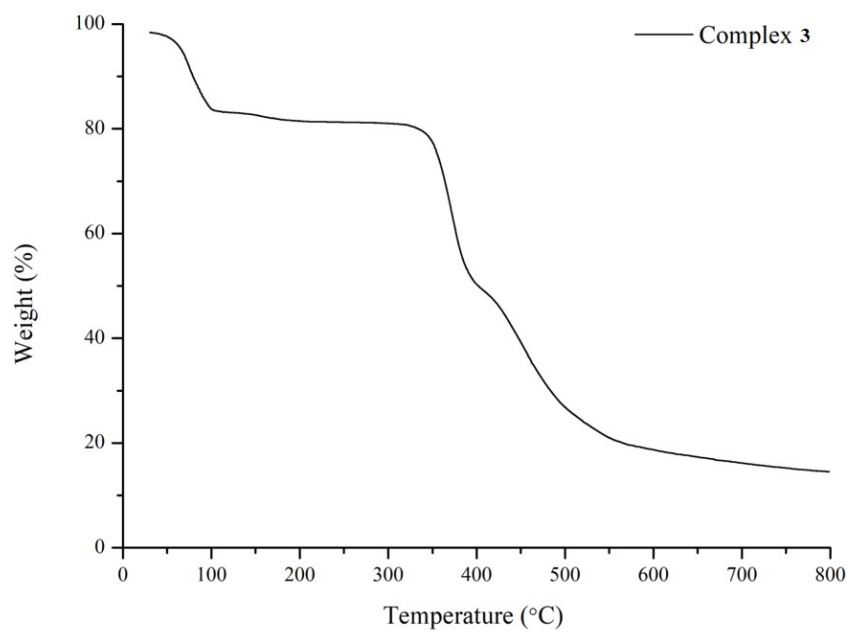

**Fig. S10.** The PXRD patterns of complex **1** before and after immersion in different solvents.

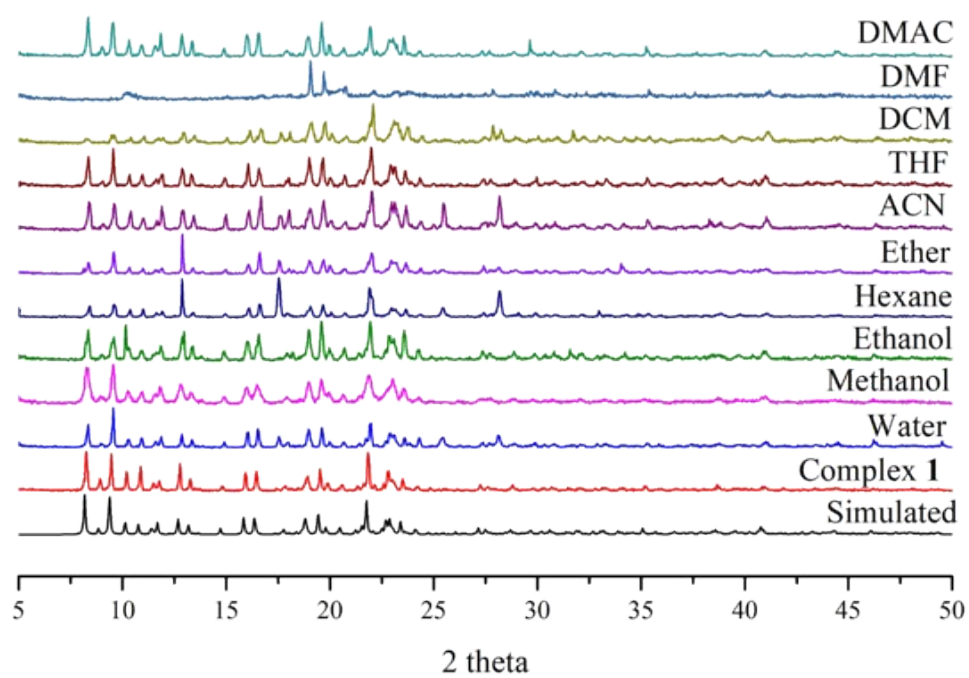

**Fig. S11.** The PXRD patterns of complex **2** before and after immersion in different solvents.

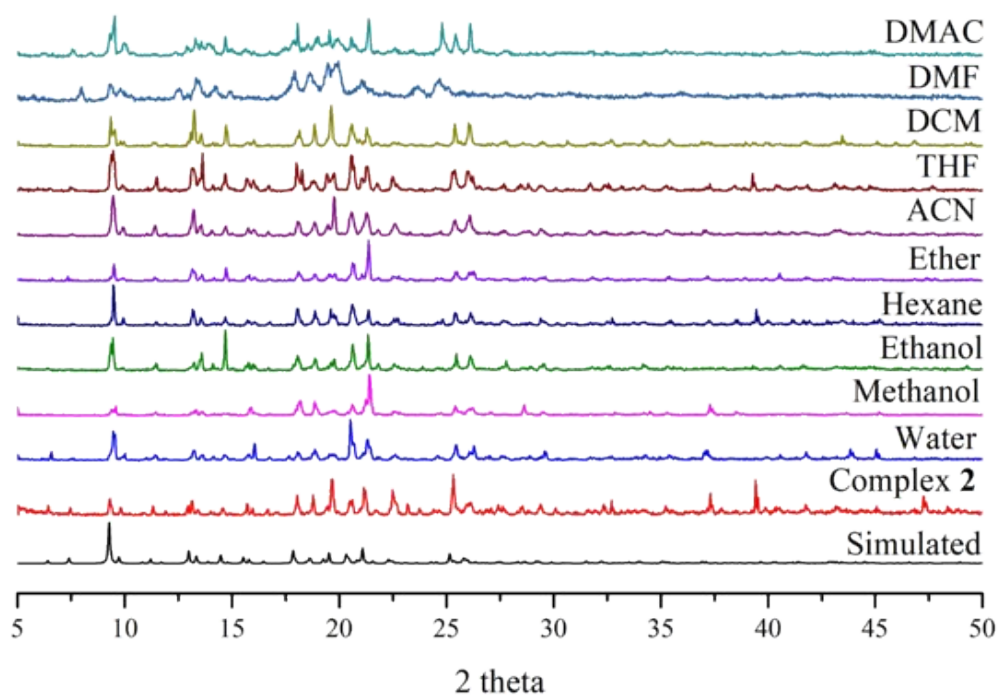

**Fig. S12.** The photoluminescence spectra of **L**.

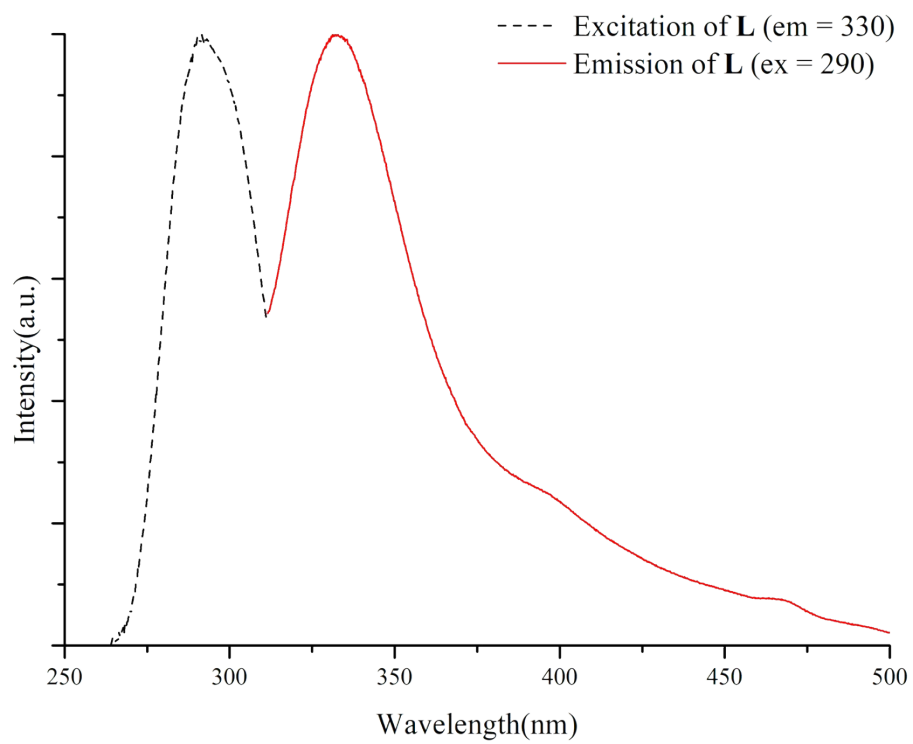

**Fig. S13.** The photoluminescence spectra of 1,4-H<sub>2</sub>BDC.

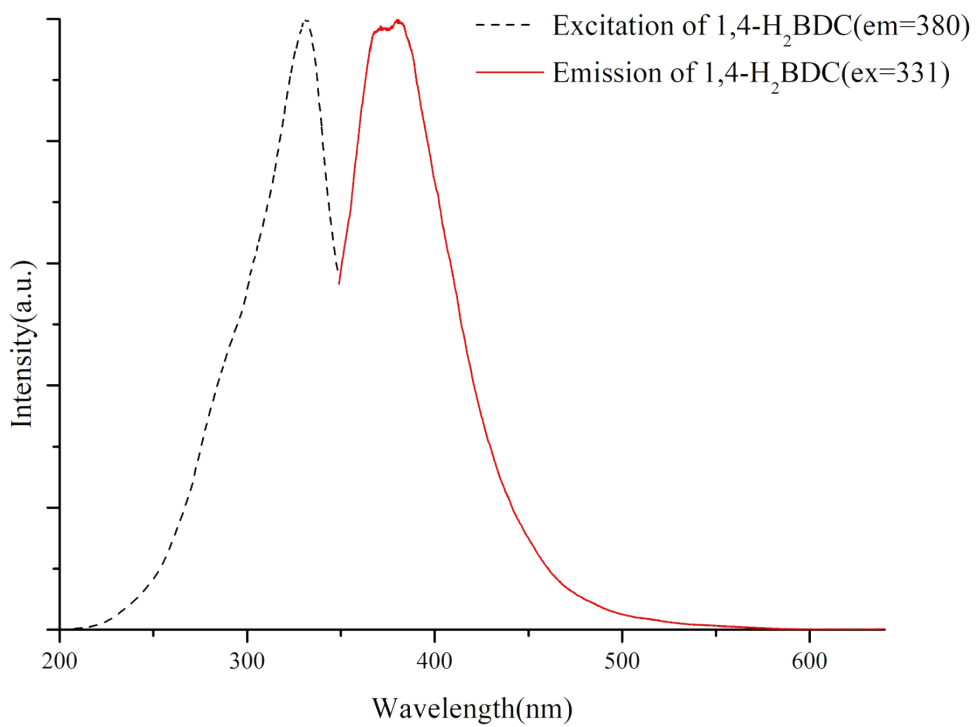

**Fig. S14.** The photoluminescence spectra of 4,4'-H<sub>2</sub>BDC.

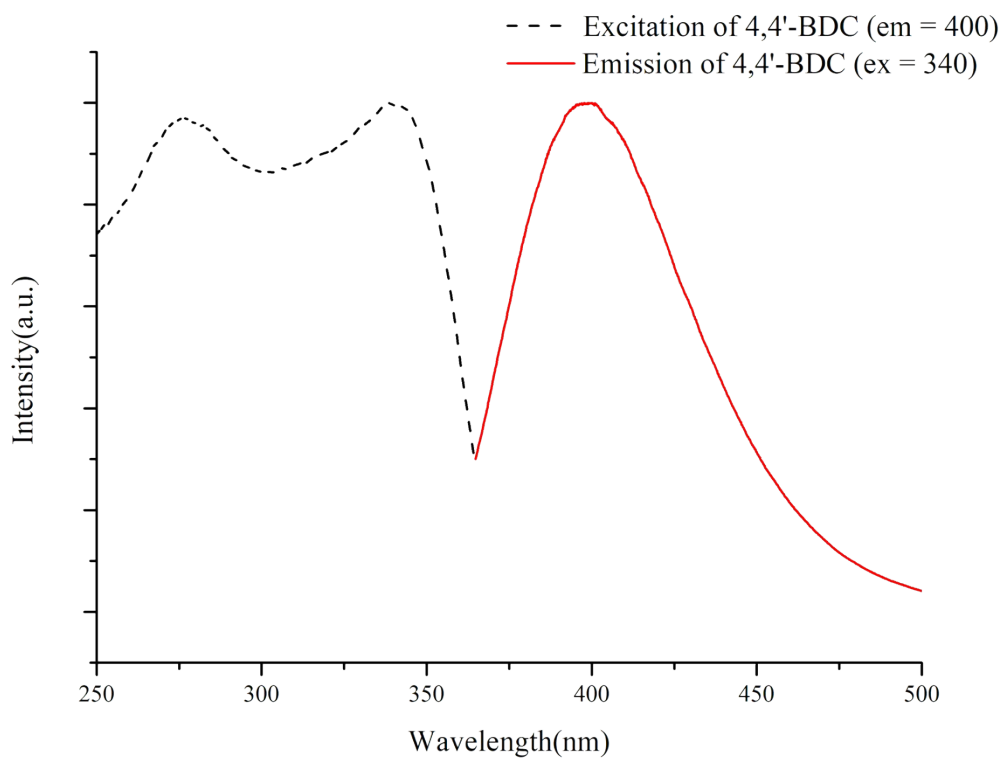

**Fig. S15.** The photoluminescence spectra of complex **1**.

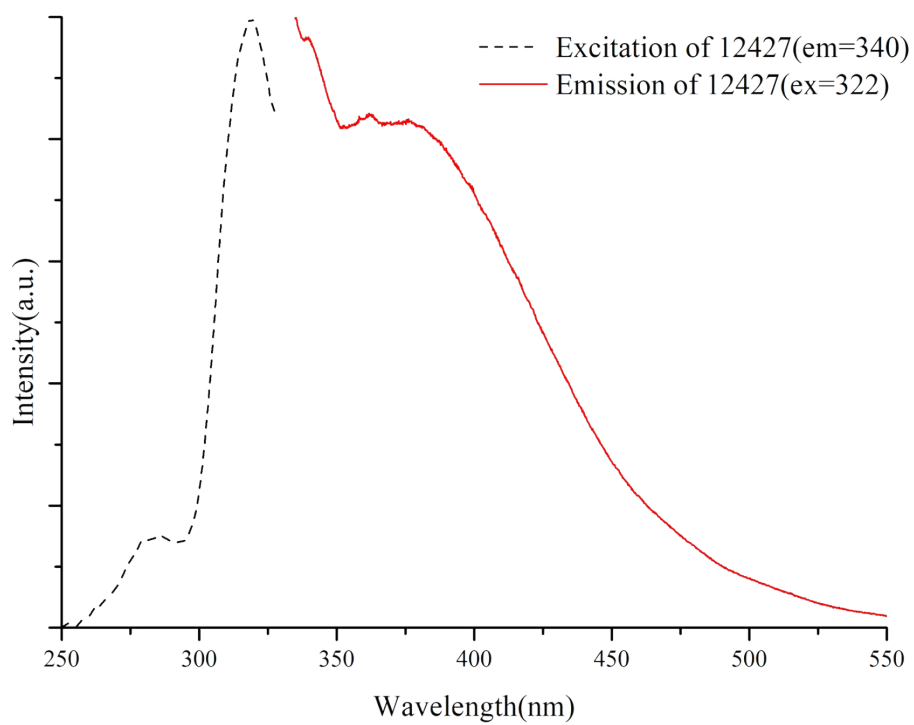



**Fig. S16.** The photoluminescence spectra of complex **2**.

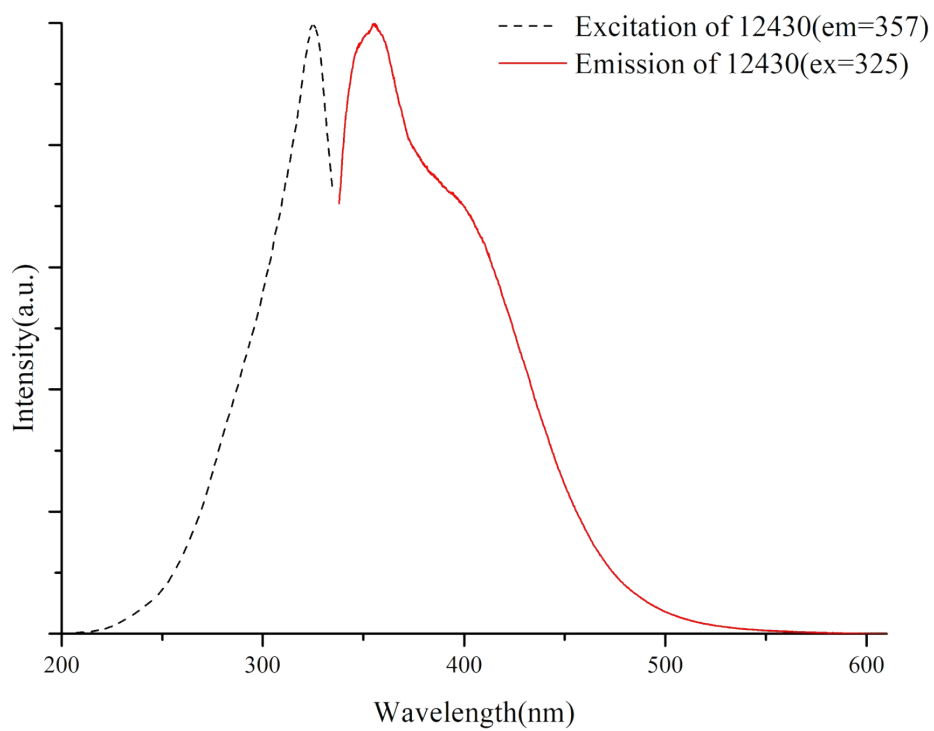

**Fig. S17.** The solid-state luminescence spectra of complex **1** before and after immersion into different metal cations.

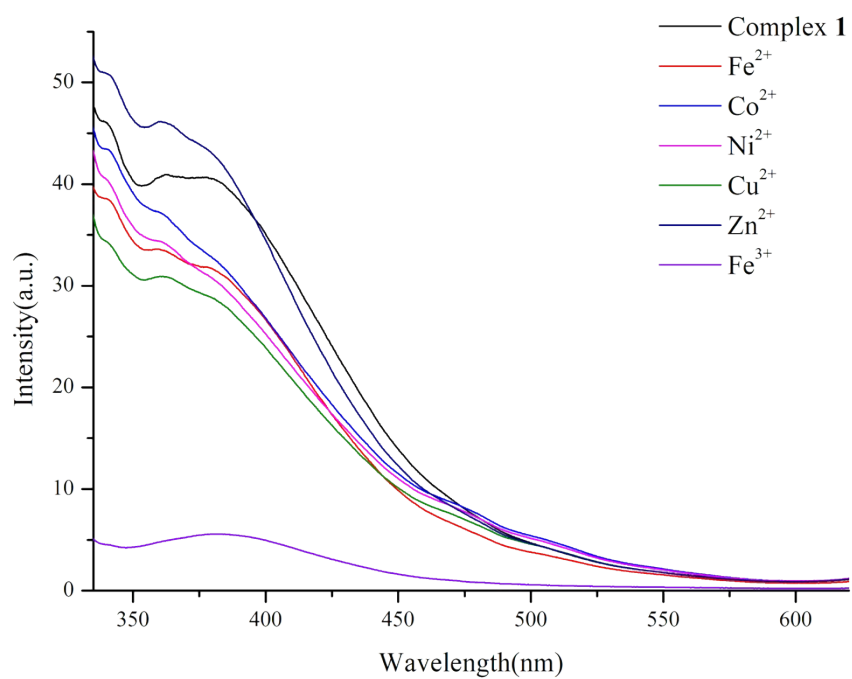

**Fig. S18.** The solid-state luminescence spectra of complex **2** before and after immersion into different metal cations.

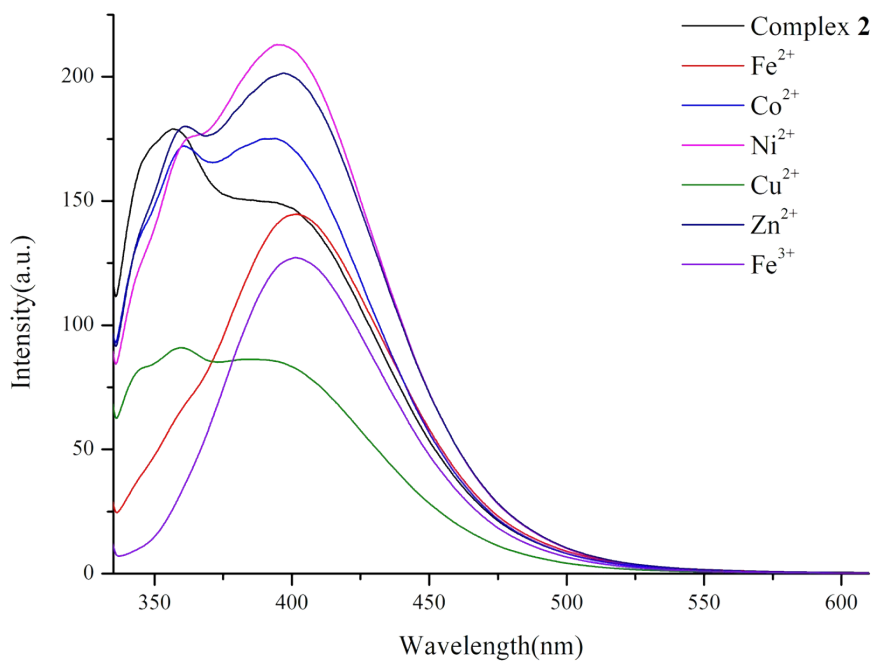

**Fig. S19.** The emission spectra of complex **1** in different concentrations of  $\text{Fe}^{3+}$  ion.

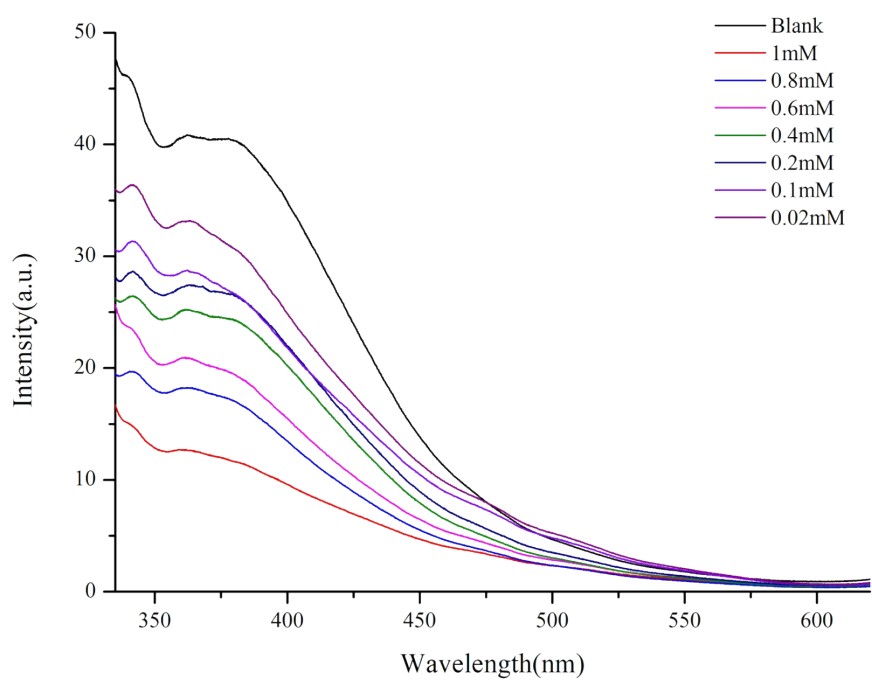



**Fig. S21.** PXRD patterns for complex **1** after Fe<sup>3+</sup> sensing for five cycles.

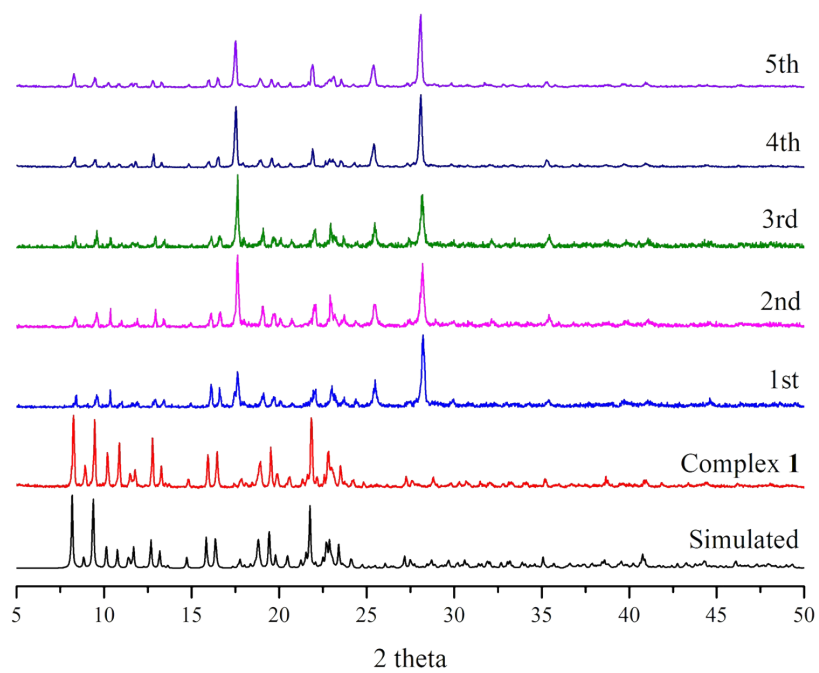

**Fig. S22.** PXRD patterns for complex **2** after Fe<sup>3+</sup> sensing for five cycles.

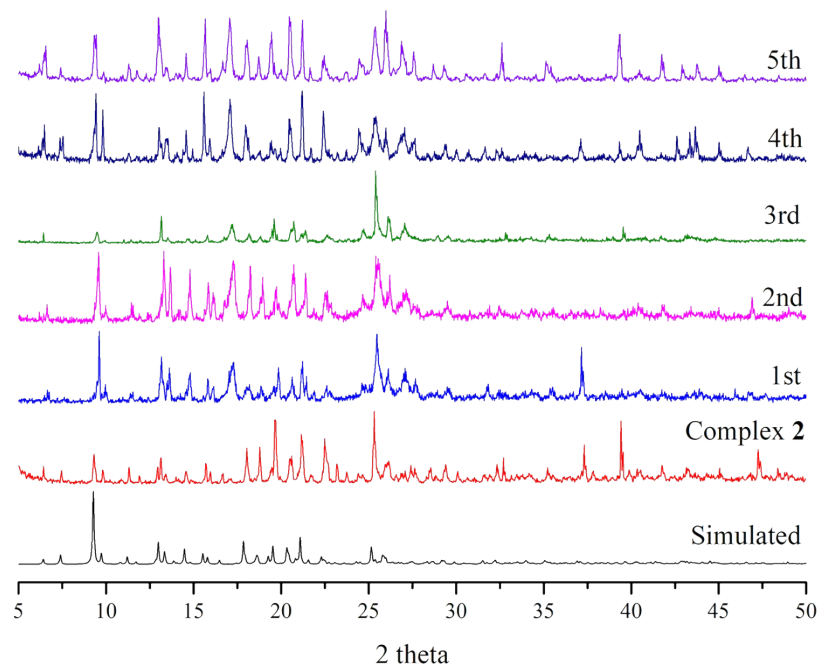

**Fig. S23.** The PXRD patterns of complex **1** before and after immersion in different metal cations.

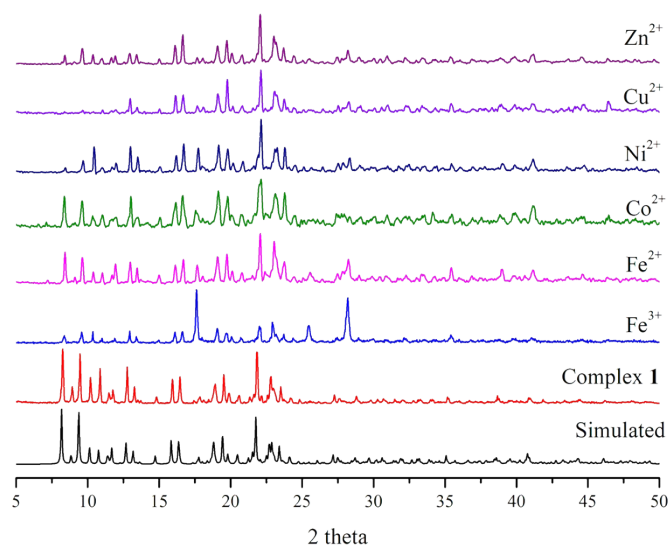



**Fig. S24.** The PXRD patterns of complex **2** before and after immersion in different metal cations.

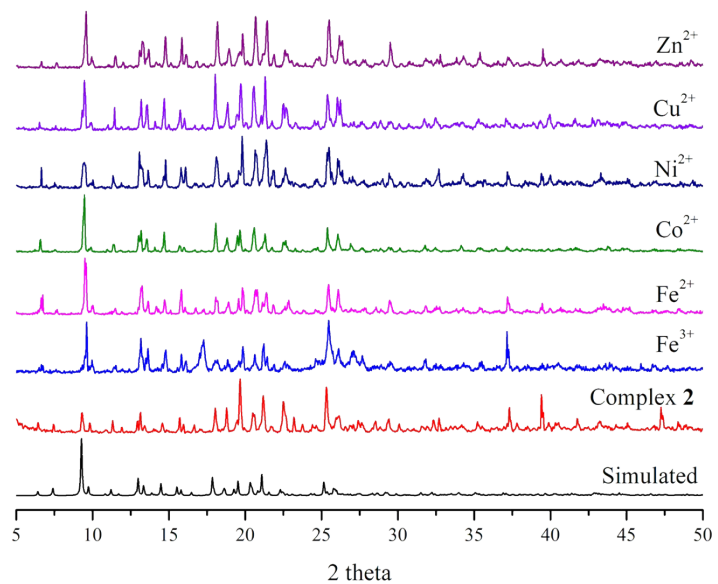

**Fig. S25.** UV-vis absorption spectra of  $\text{Fe}^{3+}$  and the excitation and emission spectra of (a) **1** and (b) **2**.

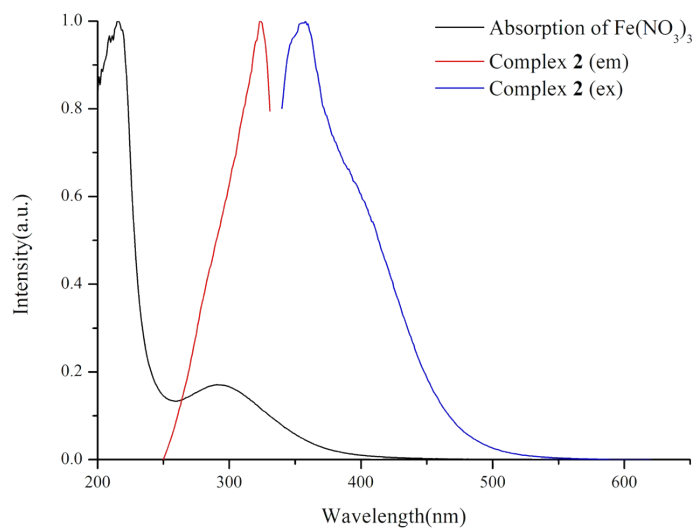

(b)

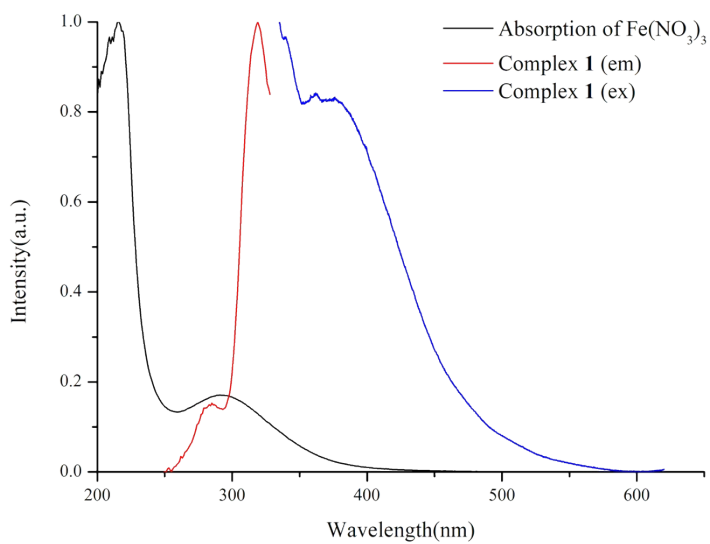

(a)

**Fig. S26.** The EDX data of complex **1**. (a) The selected part for point scan. (b) The result of point scan. (c) The element mapping scan of Fe<sup>3+</sup>. (d) The element percentage analysis of point scan.

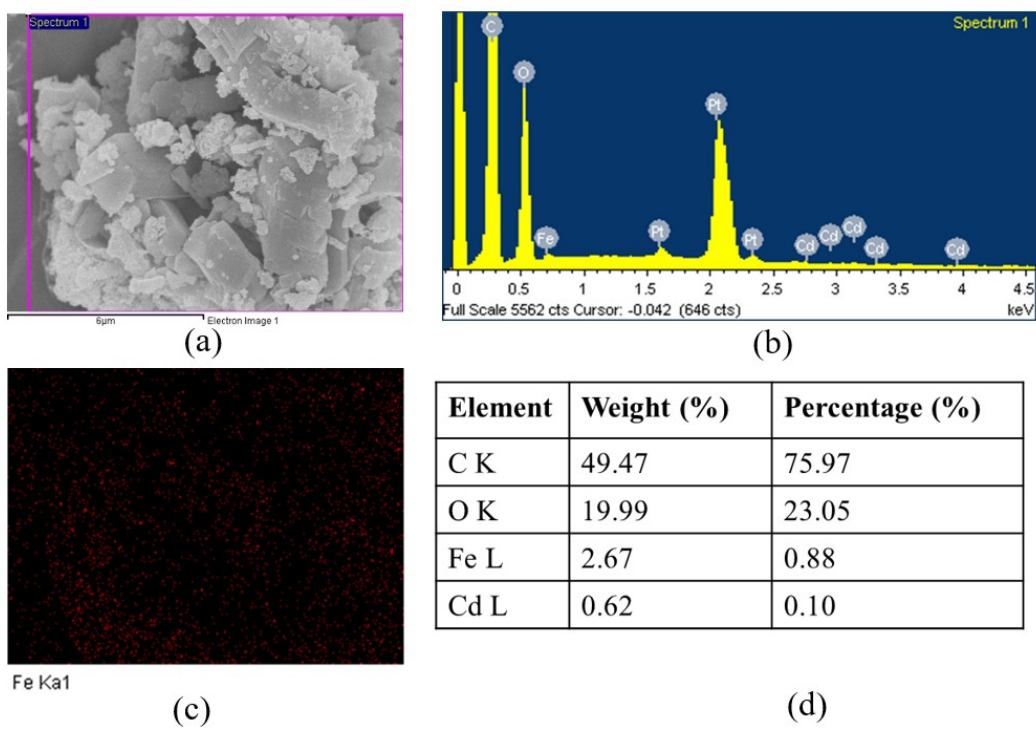

**Fig. S27.** The EDX data of complex **2**. (a) The selected part for point scan. (b) The result of point scan. (c) The element mapping scan of Fe<sup>3+</sup>. (d) The element percentage analysis of point scan.

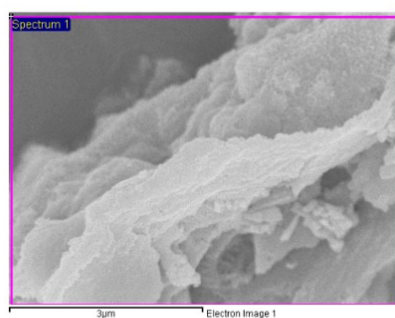

(a)

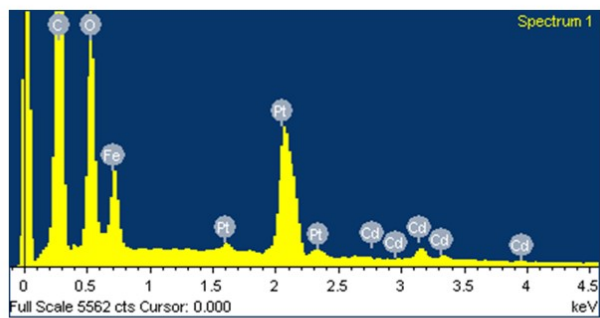

(b)

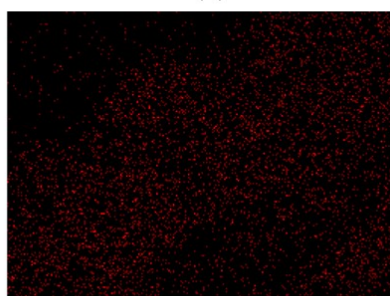

Fe Kα1

(c)

| Element | Weight (%) | Percentage (%) |
|---------|------------|----------------|
| C K     | 38.66      | 67.49          |
| O K     | 18.02      | 23.63          |
| Fe L    | 22.40      | 8.41           |
| Cd L    | 2.60       | 0.49           |

(d)

**Fig. S28.** IR spectra of **L**, 1,4-H<sub>2</sub>BDC and complex **1** before and after immersion in Fe<sup>3+</sup>.

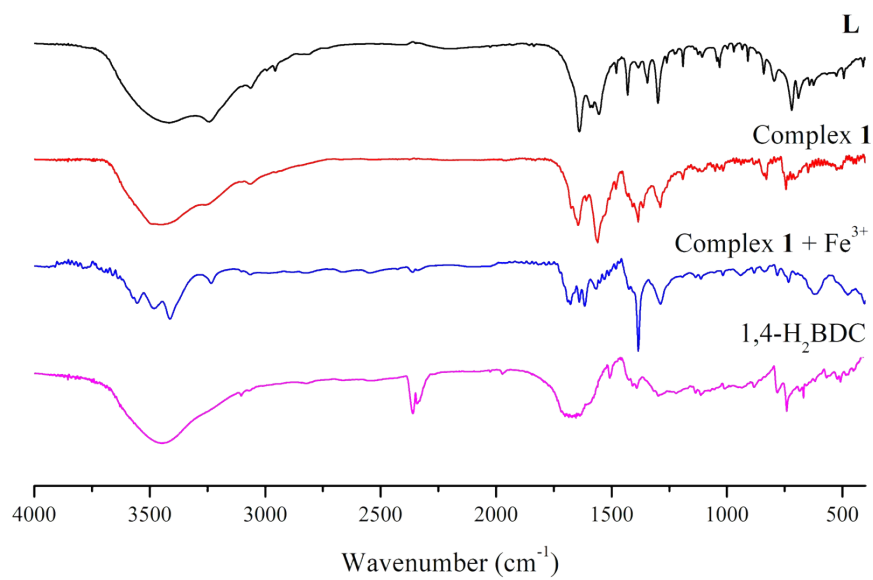

**Fig. S29.** IR spectra of **L**, 4,4'-H<sub>2</sub>BDC and complex **2** before and after immersion in Fe<sup>3+</sup>.

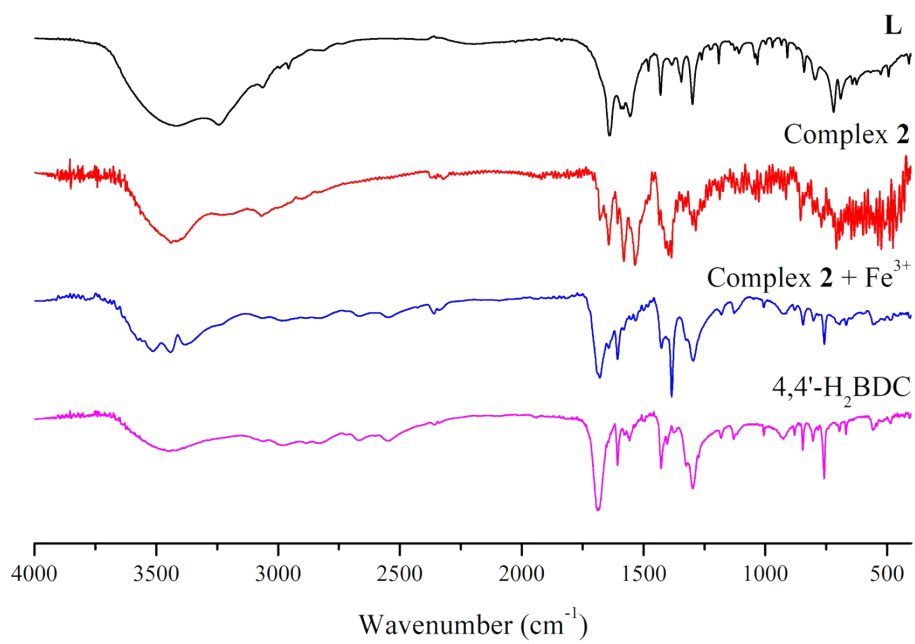

**Fig. S30.** Selected XPS patterns before and after addition of  $\text{Fe}^{3+}$  ion to complex **2**.

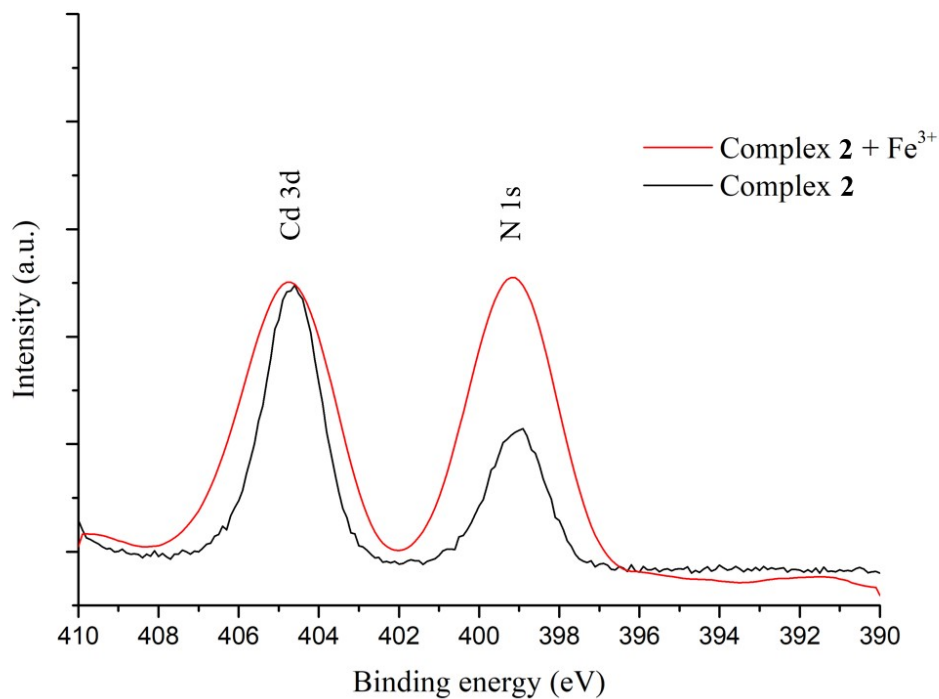

**Fig. S31.** Competitive sensing experiments in the presence of the other cations for complexes (a) **1** and (b) **2**.

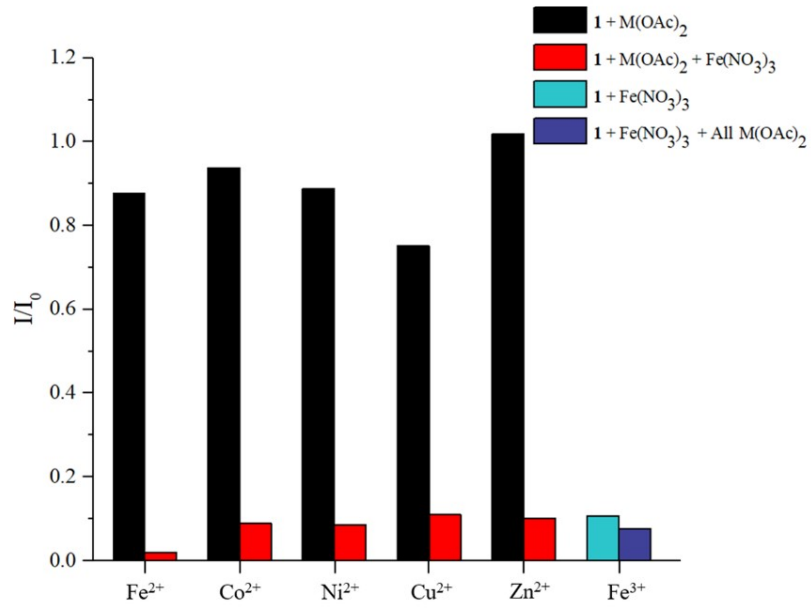

(a)

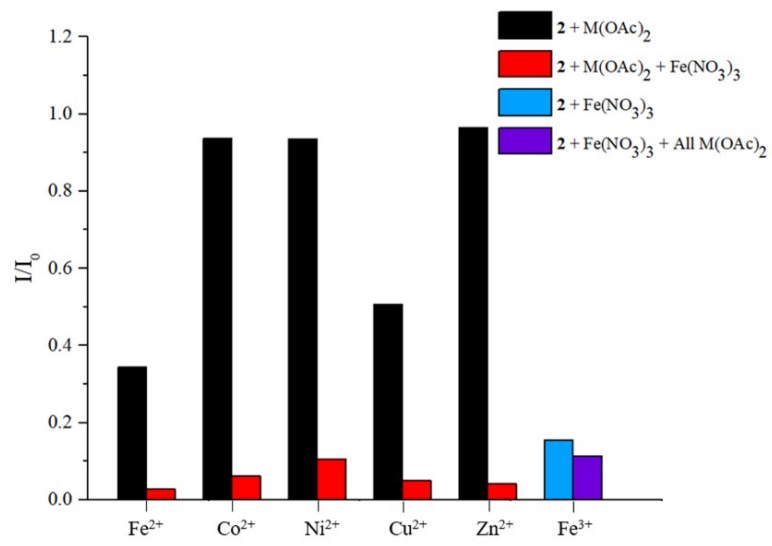

(b)



**Fig. S32.** (a) N<sub>2</sub> adsorption–desorption isotherms for complex **1**. (b) Pore-size distribution curve for complex **1**.

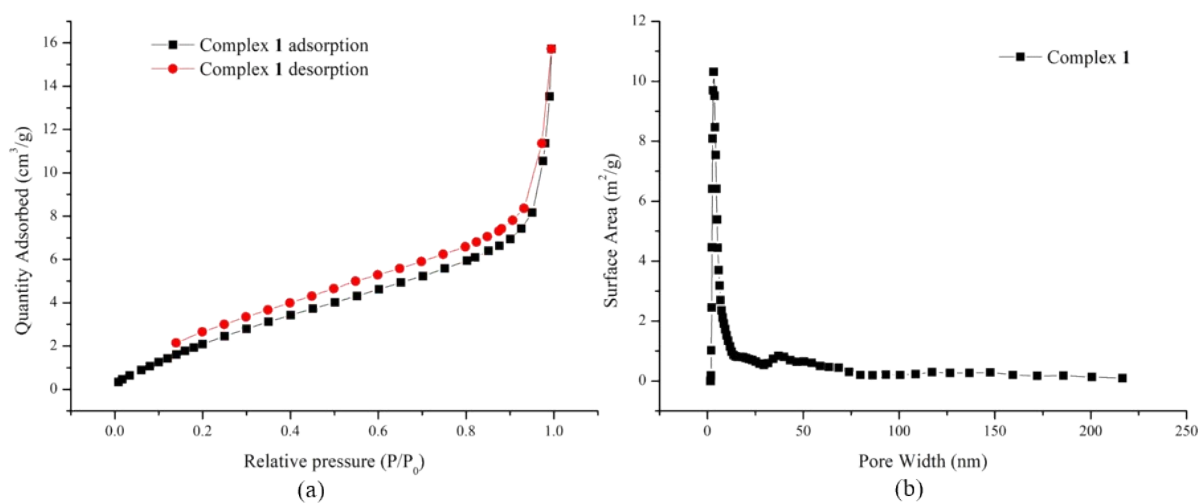

**Fig. S33.** (a) N<sub>2</sub> adsorption–desorption isotherms for complex **2**. (b) Pore-size distribution curve for complex **2**.

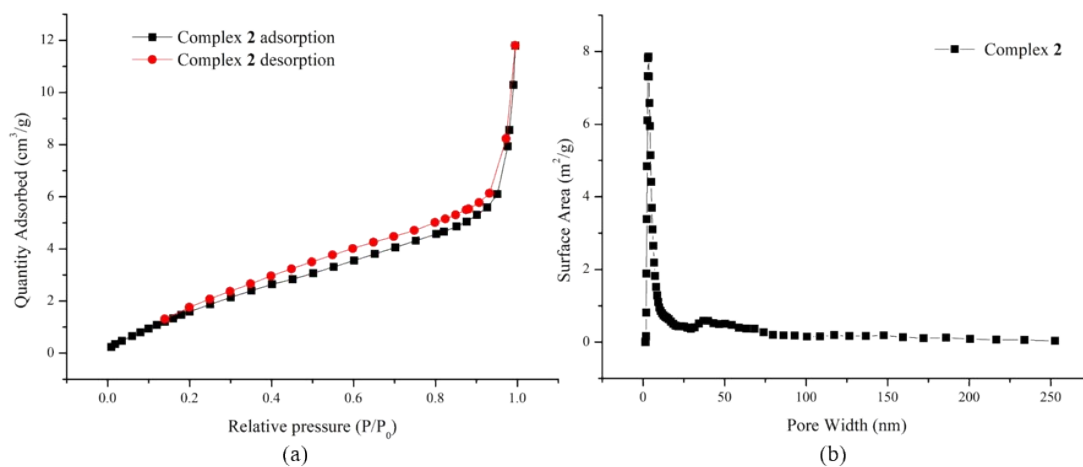

**Fig. S34.** PXRD patterns for complex **1** before and after N<sub>2</sub> adsorption and desorption.

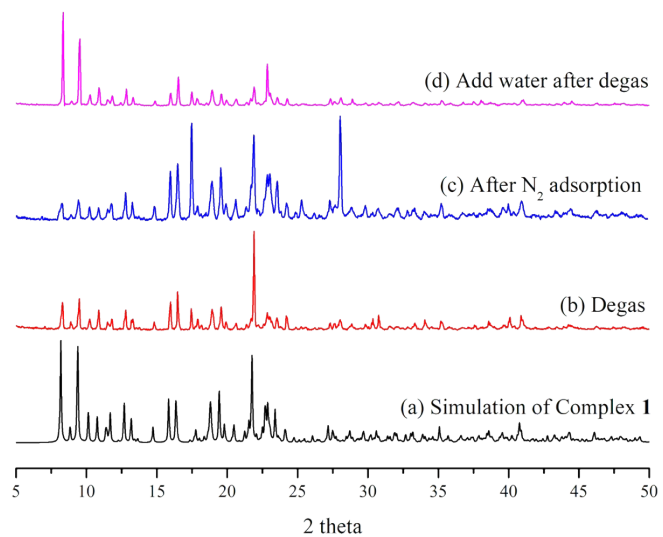

**Fig. S35.** PXRD patterns for complex **2** before and after N<sub>2</sub> adsorption and desorption.

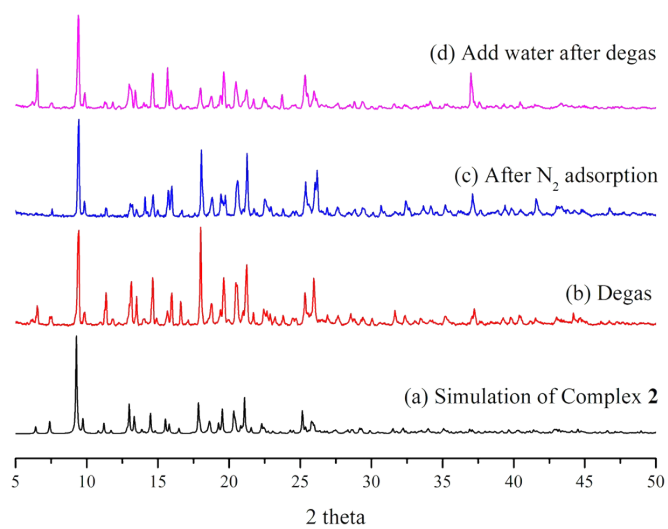

Supplement: d3ce01096a1.pdf [file d3ce01096a1.pdf]
